# Supplementary material for: Alp/Enigma Family Proteins Cooperate in Z-Disc Formation and Myofibril Assembly
Source: PLOS journal article supplement (doi:10.1371/journal.pgen.1003342), 2013-03-07

Figure S3:

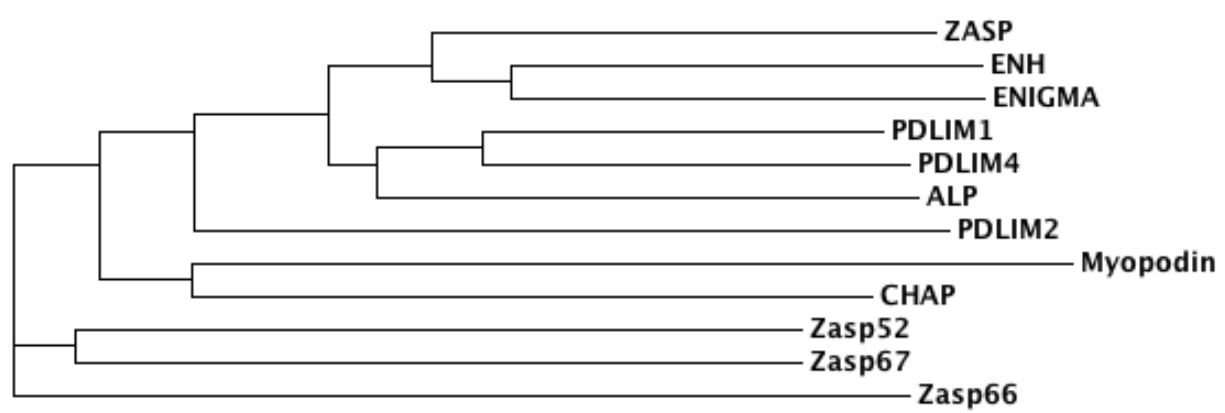

Supplement: S3 (10.1371/journal.pgen.1003342.s003) [file journal.pgen.1003342.s003]
